# Supplementary material for: Involvement of NEK2 and its interaction with NDC80 and CEP250 in hepatocellular carcinoma
Source: PubMed Central journal article supplement (PMC7590453; doi:10.1186/s12920-020-00812-y), 2020-10-27
Supplement: 12920_2020_812_MOESM4_ESM.pdf [file 12920_2020_812_MOESM4_ESM.pdf]

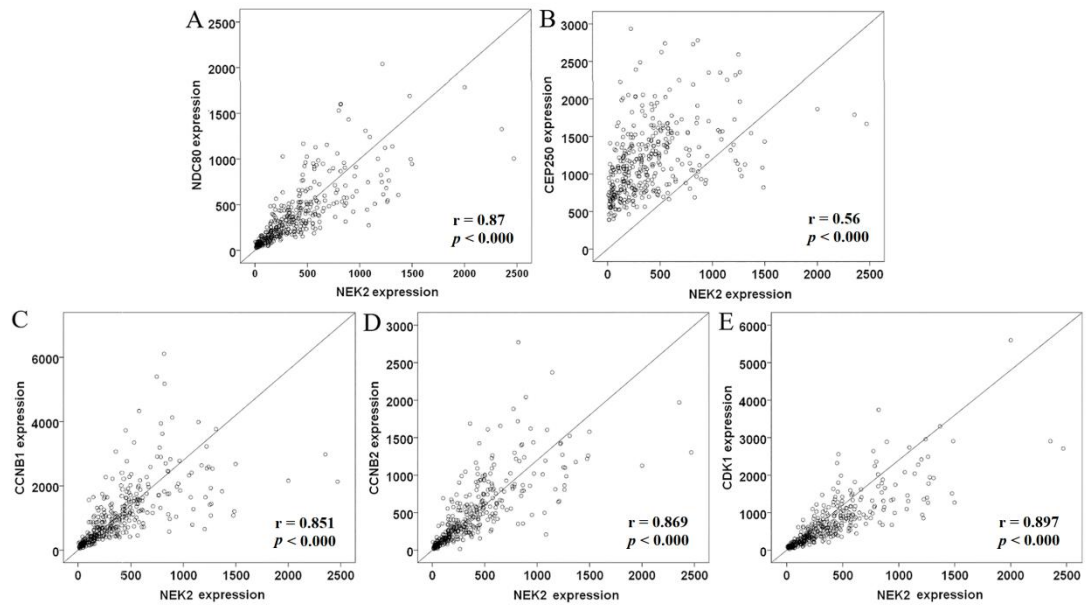

Figure S4. The correlation of mRNA expression between NDC80, CEP250, CCNB1, CCNB2, CDK1 and NEK2 from TCGA database. **A.** NEK2 vs. NDC80; **B.** NEK2 vs. CEP250; **C.** NEK2 vs. CCNB1; **D.** NEK2 vs. CCNB2; **E.** NEK2 vs. CDK1.
